# Supplementary material
Source: PubMed Central journal article supplement (PMC1976517)
Supplement: bmj_335_7619_542__1.pdf [file bmj_335_7619_542__1.pdf]

## Web references

- w1. Berlowitz DR, Ash AR, Hickey EC, Friedman RH, Glickman M, KAdler B et al. Inadequate management of blood pressure in a hypertensive population. *N Engl J Med* 1998;339:1957-63.
- w2. Andrade SE, Gurwitz JH, Field TS, Kelleher M, Majumdar SR, Reed G, et al. Hypertension management: the care gap between clinical guidelines and clinical practice. *Am J Manage Care* 2004;10:481-6.
- w3. Shah BR, Hux JE, Laupacis A, Zinman B, van Walraven C. Clinical inertia in response to inadequate glycemic control. *Diabetes Care* 2005;28:600-6.
- w4. Ziemer MD, Doyle JP, Barnes CS, Branch WT, Cook CB, El-Kebbi IM, et al. An intervention to overcome clinical inertia and improve diabetes mellitus control in a primary care setting. *Arch Intern Med* 2006;166:507-13.
- w5. Rodondi N, Peng T, Karter AJ, Bauer DC, Vittinghoff E, Tang S, et al. Therapy modifications in response to poorly controlled hypertension, dyslipidaemia and diabetes mellitus. *Ann Intern Med* 2006;144:475-84.
- w6. Okonofua EC, Simpson KN, Jesri A, Rehman SU, Durkalski VL, Egan BM. Therapeutic inertia is an impediment to achieving the Healthy People 2010 blood pressure control goals. *Hypertension* 2006;47:345-51.
- w7. Fahey T, Schroeder K, Ebrahim S. Interventions used to improve control of blood pressure in patients with hypertension. *Cochrane Database Syst Rev* 2006;(4): CD005182.
- w8. Mulrow C. *Evidence-based hypertension*. London: BMJ Books, 2001.
